# Supplementary material for: A practical synthesis of 3,4-diamino-6-azido-1H-pyrazolo[4,3-c]pyridin-5-ium energetic ionic compounds
Source: Royal Society of Chemistry journal article supplement (doi:10.1039/d3qo00343d), 2023-01-01
Supplement: d3qo00343d1.pdf [file d3qo00343d1.pdf]

# A practical synthesis of 3,4-diamino-6-azido-1*H*-pyrazolo[4,3- c]pyridin-5-ium energetic ionic compounds

Wen-Hao Cui,<sup>a</sup> Wen-Biao Zhou,<sup>a</sup> Zhiwen Ye,<sup>a</sup> Ying He<sup>\*a</sup>

<sup>a</sup> School of Chemistry and Chemical Engineering, Nanjing University of Science and Technology, Nanjing 210094, China.

\*E-mail: [yhe@njust.edu.cn](mailto:yhe@njust.edu.cn)

## Table of contents

|                                                                                  |     |
|----------------------------------------------------------------------------------|-----|
| Experimental cautions .....                                                      | S1  |
| General methods .....                                                            | S1  |
| Computations .....                                                               | S1  |
| Optimization of reaction conditions for the synthesis of compound <b>3</b> ..... | S3  |
| Crystal data .....                                                               | S6  |
| Thermal stability .....                                                          | S10 |
| Spectral data.....                                                               | S11 |
| References.....                                                                  | S18 |

## **Experimental cautions**

Cautions! Although there have been no explosions when dealing with these compounds, we strongly encourage to take strict precautions because of their relatively high energy and mechanical sensitivity. A protective goggle, protective masks and gloves must be worn at all times. The horn spoons should be used during the after-treatment process. Grinding should be avoided, if unavoidable, it is recommended to use an agate mortar, but also pay attention to the release of static electricity. All the compounds were dried under vacuum oven at 80 °C.

## **General methods**

All reagents are purchased from Energy Chemical of analytical grade and were used strictly in accordance with regulations. Nuclear magnetic resonance (NMR) spectra were recorded using an AVANCE 500 Bruker spectrometer and chemical shifts were reported in ppm. IR spectrum were recorded using KBr pellets with a Thermo Nicolet iS10 spectrometer. The melting and decomposition (onset) points were measured on a differential scanning calorimeter (Mettler Toledo DSC823e) at a scan rate of 5 °C·min<sup>-1</sup>. Densities were confirmed at room temperature by using the Micromeritics AccuPyc 1340 gas pycnometer. Impact and friction sensitivities were obtained using a standard BAM dropping hammer and a BAM friction Tester. High resolution mass spectra were obtained by using Thermo Fisher Q-Exactive-Focus LCMS. Elemental analysis was performed on Thermo Scientific FlashSmart<sup>TM</sup> instrument.

## **Computations**

The gas formation enthalpies of these compounds are calculated by using the Gaussian 09 software<sup>1</sup> with the M06-2X function<sup>2</sup> and def2-TZVP basis set<sup>3</sup>.

For energetic salts, the solid-phase heat of formation is calculated based on a Born-Haber energy cycle (Figure S1).

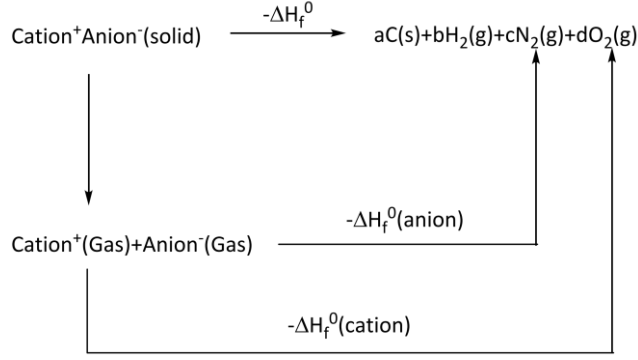

**Figure S1.** Born-Haber Cycle for the formation of energetic salts

The number is simplified by equation 1:

$$\Delta H_f^0(\text{salt}, 298\text{ K}) = \Delta H_f^0(\text{cation}, 298\text{ K}) + \Delta H_f^0(\text{anion}, 298\text{ K}) - \Delta H_L \quad (1)$$

Where  $\Delta H_L$  is the lattice energy of the salts, which could be predicted by using the formula suggested by Jenkins et al [Eq. (2)].<sup>4</sup>

$$\Delta H_L = U_{POT} + [p(n_M/2 - 2) + q(n_X/2 - 2)]RT \quad (2)$$

Where  $n_M$  and  $n_X$  depend on the nature of the ions,  $M^{q+}$  and  $X^{p-}$ , and are equal to 3 for monatomic ions, 5 for linear polyatomic ions, and 6 for nonlinear polyatomic ions. The equation for lattice potential energy  $U_{POT}$  [Eq. (3)] has the form:

$$U_{POT} [\text{kJ} \cdot \text{mol}^{-1}] = \gamma(\rho_m/M_m)^{1/3} + \delta \quad (3)$$

Where  $\rho_m$  [ $\text{g} \cdot \text{cm}^{-3}$ ] is the density of the salt,  $M_m$  is the chemical formula mass of the ionic material, the coefficients  $\gamma$  ( $\text{kJ} \cdot \text{mol}^{-1} \cdot \text{cm}$ ) and  $\delta$  ( $\text{kJ} \cdot \text{mol}^{-1}$ ) are assigned literature values.

The solid-state enthalpy of formation for neutral compound can be estimated by subtracting the heat of sublimation from gas-phase heat of formation. Based on the literature,<sup>5</sup> the heat of sublimation can be estimated according to supplementary equation (4), where SA is the surface area of the 0.001 electron/bohr<sup>3</sup> isosurface of the electron density of the molecule,  $\sigma_{\text{Tot}}^2$  is a measure of the variability of electronic potential on the surface, and  $v$  is the degree of balance between the positive and negative charges on the isosurface. The constants a, b and c are assigned literature values.

$$\Delta H(\text{Sublimation}) = a(\text{SA})^2 + b\sqrt{v\sigma_{\text{Tot}}^2} + c \quad (4)$$

$$\Delta H_{\text{g},4} = 499.78 \text{ kJ} \cdot \text{mol}^{-1}, \Delta H(\text{sub})_4 = 150.46 \text{ kJ} \cdot \text{mol}^{-1}$$

Calculation results are shown in Table S1.

**Table S1.** calculated lattice energies ( $\Delta H_{\text{Lat}}$ ) and the heats of formation of cation ( $\Delta H_{\text{f}}^{\text{Cation}}$ ) and anion ( $\Delta H_{\text{f}}^{\text{Anion}}$ )

| Compound | $\Delta H_{\text{f}}^{\text{Cation}}(\text{kJ}\cdot\text{mol}^{-1})$ | $\Delta H_{\text{f}}^{\text{Anion}}(\text{kJ}\cdot\text{mol}^{-1})$ | $\Delta H_{\text{Lat}}(\text{kJ}\cdot\text{mol}^{-1})$ |
|----------|----------------------------------------------------------------------|---------------------------------------------------------------------|--------------------------------------------------------|
| 5        | -477.42                                                              | 1259.13                                                             | 484.3                                                  |
| 6        | -477.42                                                              | 1686.97                                                             | 456.0                                                  |
| 7        | -477.42                                                              | 3134.91                                                             | 978.2                                                  |

### Optimization of reaction conditions for the synthesis of compound 3

Compound 2 was firstly synthesized according to the known literature.<sup>6</sup> To a round flask was added compound 2 (1.47 g, 10 mmol), H<sub>2</sub>O (20 mL) and a stirred bar. NaN<sub>3</sub> and ZnCl<sub>2</sub> were then added into the flask at room temperature. The reaction mixture was heated and stirred for a certain time. After the mixture cooled down to room temperature, the precipitate was collected by filtration and washed repeatedly with water. The solid was then dissolved in a small amount of concentrated hydrochloric acid. The mixture was then left to standing overnight. The resulting solid was filtered and dried under the vacuum oven at 80 °C for 24 h to accessing the desired product 3.

**Table S2.** Optimized conditions for accessing compound 3<sup>a</sup>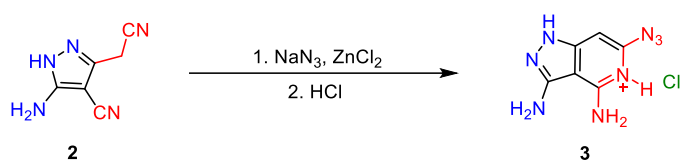

| Entry | NaN <sub>3</sub> | ZnCl <sub>2</sub> | T/°C | Yield (%) |
|-------|------------------|-------------------|------|-----------|
| 1     | 2.0 eq           | 2.0 eq            | 100  | 72        |
| 2     | 1.0 eq           | 2.0 eq            | 100  | 72        |
| 3     | 1.0 eq           | 1.0 eq            | 100  | 72        |
| 4     | 1.0 eq           | -                 | 100  | 0         |
| 5     | 1.0 eq           | 0.2 eq            | 100  | 7         |
| 6     | 1.0 eq           | 1.0 eq            | 80   | 25        |

<sup>a</sup> Compound 2 (10 mmol), H<sub>2</sub>O (20 mL), NaN<sub>3</sub>, ZnCl<sub>2</sub>, isolated yield after the vacuum drying.

### Synthesis

**6-azido-1H-pyrazolo[4,3-c]pyridine-3,4-diamine hydrochloride (3):** To a round flask was added compound 2 (1.47 g, 10 mmol), H<sub>2</sub>O (20 mL) and a stirred bar. NaN<sub>3</sub> (0.65 g, 10 mmol) and ZnCl<sub>2</sub> (1.36 g, 10 mmol) were then added into the flask at room temperature. The reaction mixture was heated to 100 °C and stirred for 10 h. After the mixture cooled down to room temperature, the precipitate was collected by filtration and washed repeatedly with water. The solid was then

dissolved in a small amount of concentrated hydrochloric acid. The mixture was then left to standing overnight. The resulting solid was filtered and dried under the vacuum oven at 80 °C for 24 h to accessing the desired product **3** as brown solid (1.63 g, 72% yield). **<sup>1</sup>H NMR (500 MHz, DMSO-*d*<sub>6</sub>)** δ 8.89 (s, 1H), 7.93 (s, 2H), 6.58 (s, 1H), 6.25 (s, 2H). **<sup>13</sup>C NMR (126 MHz, DMSO-*d*<sub>6</sub>)** δ 152.35, 148.85, 147.81, 147.57, 92.36, 84.72. **IR (KBr):**  $\tilde{\nu}$ =3401.39, 3187.19, 2910.78, 2147.50, 1659.67, 1615.95, 1542.50, 1453.77, 1318.30, 1260.20, 1145.37, 1044.86, 982.64, 840.62, 808.00, 751.68, 636.68, 596.43, 574.68, 493.47, 434.16, 419.62 cm<sup>-1</sup>. Elemental analysis for C<sub>6</sub>H<sub>7</sub>N<sub>8</sub>Cl (226.05): calcd. C 31.80, H 3.11, N 49.44%; found C 31.81, H 3.10, N 49.45%.

**6-azido-1*H*-pyrazolo[4,3-*c*]pyridine-3,4-diamine (4):** To a round flask was added compound **3** (2.26 g, 10 mmol), H<sub>2</sub>O (10 mL) and a stirred bar. The sodium bicarbonate (0.84 g, 10 mmol) was dissolved in a small amount of H<sub>2</sub>O and then added into the mixture. The reaction mixture was stirred at room temperature for 30 min. The resulting yellow solid was then collected by filtration and vacuum dried at 80 °C for 24 h to obtain compound **4** (1.09 g, 57% yield). **<sup>1</sup>H NMR (500 MHz, DMSO-*d*<sub>6</sub>)** δ 11.49 (s, 1H), 8.22 (s, 2H), 6.55 (s, 1H), 5.86 (s, 2H). **<sup>13</sup>C NMR (126 MHz, DMSO-*d*<sub>6</sub>)** δ 149.62, 149.14, 147.07, 137.77, 93.03, 71.46. **IR (KBr):**  $\tilde{\nu}$ =3429.25, 3331.59, 3158.01, 2220.99, 1637.68, 1598.25, 1559.97, 1540.11, 1512.53, 1484.95, 1427.43, 1406.05, 1359.21, 1330.85, 1291.93, 1269.50, 1229.04, 1194.12, 1139.19, 1122.64, 1061.11, 1032.15, 1020.24, 929.02, 856.91, 821.73, 786.00, 740.05, 714.00, 675.81, 656.12, 518.72, 450.81 cm<sup>-1</sup>. Elemental analysis for C<sub>6</sub>H<sub>6</sub>N<sub>8</sub> (190.07): calcd. C 37.90, H 3.18, N 58.92%; found: C 37.88, H 3.20, N 58.91%. HRMS (ESI) *m/z*: [M-H]<sup>-</sup> Calcd for C<sub>6</sub>H<sub>5</sub>N<sub>8</sub><sup>-</sup>: 189.0643, Found 189.0631.

**3,4-diamino-6-azido-1*H*-pyrazolo[4,3-*c*]pyridin-5-ium nitrate (5):** To a round flask was added compound **4** (0.38 g, 2 mmol) and a stirred bar. Then HNO<sub>3</sub> (7.5 mL, 10%) aq. was added slowly and the mixture was stirred at 50 °C for 30 min. After the mixture cooled down to room temperature, the resulting precipitate was collected by filtration and vacuum dried at 80 °C for 24 h to afford compound **5** as a brown solid (0.36g, 71% yield). **<sup>1</sup>H NMR (500 MHz, DMSO-*d*<sub>6</sub>)** δ 8.81 (s, 1H), 7.59 (s, 2H), 6.62 (s, 1H), 6.24 (s, 2H). **<sup>13</sup>C NMR (126 MHz, DMSO-*d*<sub>6</sub>)** δ 149.76, 148.98, 147.37, 139.50, 92.63, 72.02. **IR (KBr):**  $\tilde{\nu}$ =3385.32, 3243.32, 3164.89, 2221.53, 2151.04, 1685.94, 1634.11, 1592.08, 1540.13, 1426.82, 1386.07, 1343.23, 1298.76, 1249.90, 1229.98, 1179.44, 1109.47, 1040.47, 1011.24, 987.78, 913.89, 833.09, 784.82, 721.34, 698.61, 660.03, 564.49, 507.81, 459.54, 418.93 cm<sup>-1</sup>. Elemental analysis for C<sub>6</sub>H<sub>7</sub>N<sub>9</sub>O<sub>3</sub> (253.07): calcd. C 28.46, H 2.79, N 49.79%; found:

C 28.48, H 2.80, N 49.77%.

**3,4-diamino-6-azido-1*H*-pyrazolo[4,3-*c*]pyridin-5-ium (*Z*)-5-(nitroimino)-4,5-dihydro-1*H*-tetrazol-5-yl)nitramide (6):**

To a round flask with compound **4** (0.38 g, 2 mmol) and H<sub>2</sub>O (5 mL) was added *N*-(1*H*-tetrazol-5-yl)nitramide (0.26 g, 2 mmol) and a stirred bar. The reaction mixture was heated to 100 °C and stirred for 30 min. The mixture was then cooled down to room temperature. The resulting precipitate was collected by filtration and vacuum dried at 80 °C for 24 h to afford **6** as a yellow solid (0.42 g, 65% yield). <sup>1</sup>H NMR (500 MHz, DMSO-*d*<sub>6</sub>) δ 8.33 (s, 2H), 7.26 (s, 1H), 6.55 (s, 1H), 6.11 (s, 1H), 4.18 (s, 2H). <sup>13</sup>C NMR (126 MHz, DMSO-*d*<sub>6</sub>) δ <sup>13</sup>C NMR (126 MHz, DMSO) δ 149.64, 149.11, 148.44, 147.06, 137.79, 93.02, 71.47. IR (KBr):  $\tilde{\nu}$  = 3431.63, 3336.61, 3264.66, 3167.62, 3094.17, 2988.17, 2900.90, 2222.64, 1661.01, 1635.38, 1599.92, 1560.27, 1539.02, 1485.71, 1428.27, 1406.73, 1331.01, 1269.87, 1228.34, 1194.83, 1142.91, 1122.54, 1065.54, 1043.18, 857.81, 821.44, 786.30, 689.56, 675.46, 656.76, 533.50, 452.10 cm<sup>-1</sup>. Elemental analysis for C<sub>7</sub>H<sub>8</sub>N<sub>14</sub>O<sub>2</sub> (320.10): calcd. C 26.25, H 2.52, N 61.24%; found: C 26.28, H 2.51, N 61.28%.

**Bis{3,4-diamino-6-azido-1*H*-pyrazolo[4,3-*c*]pyridin-5-ium}4,4',5,5'-tetranitro-[2,2'-biimidazole]-1,1'-diide (7):**

To a round flask was added compound **4** (0.38 g, 2 mmol), H<sub>2</sub>O (5 mL) and a stirred bar. Compound 4,4',5,5'-tetranitro-1*H*,1'*H*-2,2'-biimidazole (0.31 g, 1 mmol) was then added into the mixture. The reaction mixture was heated to 100 °C with stirring. After another 30 min, the mixture was cooled down to room temperature, the precipitate was collected by filtration and vacuum dried at 80 °C for 24 h to afford **7** as a yellow solid (0.51 g, 79% yield). <sup>1</sup>H NMR (500 MHz, DMSO-*d*<sub>6</sub>) δ 8.34 (s, 2H), 7.21 (s, 1H), 6.55 (s, 1H), 6.11 (s, 1H), 4.18 (s, 2H). <sup>13</sup>C NMR (126 MHz, DMSO-*d*<sub>6</sub>) δ 154.48, 149.67, 149.15, 147.10, 141.12, 139.35, 138.27, 71.63. IR (KBr): 3675.37, 3464.76, 3378.06, 3325.52, 2988.09, 2900.82, 2222.68, 2132.99, 1663.78, 1627.51, 1549.24, 1515.83, 1478.40, 1456.18, 1394.85, 1365.63, 1309.36, 1229.22, 1149.57, 1065.82, 958.96, 891.91, 854.48, 824.85, 810.26, 791.47, 771.76, 751.96, 698.39, 673.06, 601.65, 523.88, 451.90, 434.30, 418.54 cm<sup>-1</sup>. Elemental analysis for C<sub>18</sub>H<sub>14</sub>N<sub>24</sub>O<sub>8</sub> (694.14): calcd. C 31.13, H 2.03, N 48.41%; found: C 31.10, H 2.05, N 48.45%.

## Crystal data

**Table S3.** Crystallographic data for **3·H<sub>2</sub>O** and **5·H<sub>2</sub>O**

| Compound                                    | <b>3·H<sub>2</sub>O</b>                                       | <b>5·H<sub>2</sub>O</b>                                       |
|---------------------------------------------|---------------------------------------------------------------|---------------------------------------------------------------|
| Empirical formula                           | C <sub>6</sub> H <sub>9</sub> N <sub>8</sub> OCl              | C <sub>6</sub> H <sub>9</sub> N <sub>9</sub> O <sub>4</sub>   |
| Formula weight                              | 244.66                                                        | 271.22                                                        |
| Temperature/K                               | 296(2)                                                        | 296(2)                                                        |
| Crystal system                              | monoclinic                                                    | monoclinic                                                    |
| Space group                                 | P2 <sub>1</sub> /c                                            | P2 <sub>1</sub> /m                                            |
| a/Å                                         | 6.9239(5)                                                     | 9.2168(14)                                                    |
| b/Å                                         | 8.6109(6)                                                     | 6.5123(11)                                                    |
| c/Å                                         | 17.0430(12)                                                   | 10.2460(15)                                                   |
| α/°                                         | 90                                                            | 90                                                            |
| β/°                                         | 93.587(2)                                                     | 115.755(4)                                                    |
| γ/°                                         | 90                                                            | 90                                                            |
| Volume/Å <sup>3</sup>                       | 1014.13(12)                                                   | 553.90(15)                                                    |
| Z                                           | 4                                                             | 2                                                             |
| ρ <sub>calc</sub> /cm <sup>3</sup>          | 1.602                                                         | 1.626                                                         |
| μ/mm <sup>-1</sup>                          | 0.372                                                         | 0.138                                                         |
| F(000)                                      | 504.0                                                         | 280.0                                                         |
| Crystal size/mm <sup>3</sup>                | 0.26 × 0.23 × 0.2                                             | 0.15 × 0.01 × 0.01                                            |
| Radiation                                   | MoKα (λ = 0.71073)                                            | MoKα (λ = 0.71073)                                            |
| 2θ range for data collection/°              | 5.302 to 55.04                                                | 4.414 to 54.974                                               |
| Index ranges                                | -8 ≤ h ≤ 8, -10 ≤ k ≤ 11, -22 ≤ l ≤ 19                        | -11 ≤ h ≤ 11, -8 ≤ k ≤ 7, -13 ≤ l ≤ 13                        |
| Reflections collected                       | 9212                                                          | 6862                                                          |
| Independent reflections                     | 2316 [R <sub>int</sub> = 0.0246, R <sub>sigma</sub> = 0.0230] | 1383 [R <sub>int</sub> = 0.0558, R <sub>sigma</sub> = 0.0552] |
| Data/restraints/parameters                  | 2316/3/157                                                    | 1383/0/118                                                    |
| Goodness-of-fit on F <sup>2</sup>           | 1.043                                                         | 1.034                                                         |
| Final R indexes [I ≥ 2σ (I)]                | R <sub>1</sub> = 0.0369, wR <sub>2</sub> = 0.0987             | R <sub>1</sub> = 0.0540, wR <sub>2</sub> = 0.1114             |
| Final R indexes [all data]                  | R <sub>1</sub> = 0.0451, wR <sub>2</sub> = 0.1044             | R <sub>1</sub> = 0.1010, wR <sub>2</sub> = 0.1263             |
| Largest diff. peak/hole / e Å <sup>-3</sup> | 0.36/-0.43                                                    | 0.29/-0.20                                                    |

**Table S4.** Bond lengths [Å] for **3·H<sub>2</sub>O**.

| parameter | Bond lengths [Å] | parameter  | Bond lengths [Å] |
|-----------|------------------|------------|------------------|
| C(1)-N(2) | 1.3253(19)       | C(6)-N(5)  | 1.359(2)         |
| C(1)-N(1) | 1.365(2)         | N(1)-H(1A) | 0.86             |
| C(1)-C(2) | 1.432(2)         | N(1)-H(1B) | 0.86             |
| C(2)-C(6) | 1.400(2)         | N(2)-N(3)  | 1.3820(18)       |
| C(2)-C(3) | 1.408(2)         | N(3)-H(3)  | 0.839(19)        |
| C(3)-N(3) | 1.3314(19)       | N(4)-H(4A) | 0.86             |
| C(3)-C(4) | 1.412(2)         | N(4)-H(4B) | 0.86             |
| C(4)-C(5) | 1.354(2)         | N(5)-H(5)  | 0.81(2)          |
| C(4)-H(4) | 0.93             | N(6)-N(7)  | 1.2486(19)       |
| C(5)-N(5) | 1.3747(19)       | N(7)-N(8)  | 1.117(2)         |
| C(5)-N(6) | 1.4039(19)       | O(1)-H(1C) | 0.845(16)        |
| C(6)-N(4) | 1.3231(19)       | O(1)-H(1D) | 0.844(15)        |

**Table S5.** Bond angles [°] for 3·H<sub>2</sub>O.

| parameter      | Bond angles [°] | parameter        | Bond lengths [Å] |
|----------------|-----------------|------------------|------------------|
| N(2)-C(1)-N(1) | 121.69(14)      | N(5)-C(6)-C(2)   | 116.29(13)       |
| N(2)-C(1)-C(2) | 110.42(13)      | C(1)-N(1)-H(1A)  | 120              |
| N(1)-C(1)-C(2) | 127.76(14)      | C(1)-N(1)-H(1B)  | 120              |
| C(6)-C(2)-C(3) | 119.20(13)      | H(1A)-N(1)-H(1B) | 120              |
| C(6)-C(2)-C(1) | 135.78(14)      | C(1)-N(2)-N(3)   | 105.60(12)       |
| C(3)-C(2)-C(1) | 104.81(13)      | C(3)-N(3)-N(2)   | 112.62(12)       |
| N(3)-C(3)-C(2) | 106.55(12)      | C(3)-N(3)-H(3)   | 124.4(13)        |
| N(3)-C(3)-C(4) | 130.45(13)      | N(2)-N(3)-H(3)   | 122.6(13)        |
| C(2)-C(3)-C(4) | 122.94(13)      | C(6)-N(4)-H(4A)  | 120              |
| C(5)-C(4)-C(3) | 115.14(13)      | C(6)-N(4)-H(4B)  | 120              |
| C(5)-C(4)-H(4) | 122.4           | H(4A)-N(4)-H(4B) | 120              |
| C(3)-C(4)-H(4) | 122.4           | C(6)-N(5)-C(5)   | 124.12(13)       |
| C(4)-C(5)-N(5) | 122.27(13)      | C(6)-N(5)-H(5)   | 118.2(13)        |
| C(4)-C(5)-N(6) | 127.90(13)      | C(5)-N(5)-H(5)   | 117.2(13)        |
| N(5)-C(5)-N(6) | 109.83(13)      | N(7)-N(6)-C(5)   | 114.60(13)       |
| N(4)-C(6)-N(5) | 117.72(14)      | N(8)-N(7)-N(6)   | 172.14(16)       |
| N(4)-C(6)-C(2) | 125.99(14)      | H(1C)-O(1)-H(1D) | 110(2)           |

**Table S6.** Hydrogen bonds for 3·H<sub>2</sub>O [Å and °].

| D-H...A              | d(D-H)    | d(H...A)  | d(D...A)   | <(DHA)    |
|----------------------|-----------|-----------|------------|-----------|
| N(4)-H(4A)...Cl(1)   | 0.86      | 2.46      | 3.2359(15) | 151       |
| N(4)-H(4B)...O(1)#1  | 0.86      | 2.42      | 3.047(2)   | 130.6     |
| N(5)-H(5)...Cl(1)    | 0.81(2)   | 2.377(19) | 3.1449(14) | 157.5(17) |
| N(1)-H(1A)...N(2)#2  | 0.86      | 2.3       | 3.1346(19) | 163       |
| N(1)-H(1B)...O(1)#1  | 0.86      | 2.55      | 3.229(2)   | 137.1     |
| C(4)-H(4)...Cl(1)#3  | 0.93      | 2.78      | 3.6615(15) | 158.8     |
| N(3)-H(3)...O(1)     | 0.839(19) | 2.027(19) | 2.8497(18) | 166.5(19) |
| O(1)-H(1C)...Cl(1)#3 | 0.845(16) | 2.322(15) | 3.1466(15) | 165(2)    |
| O(1)-H(1D)...Cl(1)#4 | 0.844(15) | 2.428(16) | 3.2721(16) | 179(2)    |

Symmetry transformations used to generate equivalent atoms:

#1 x, -y+1/2, z-1/2    #2 -x+1, -y, -z+1    #3 x, -y+3/2, z+1/2

#4 -x, -y+1, -z+1

**Table S7.** Torsion Angles [°] for 3·H<sub>2</sub>O

| parameter           | Torsion Angles [°] | parameter           | Torsion Angles [°] |
|---------------------|--------------------|---------------------|--------------------|
| C(1)-C(2)-C(3)-C(4) | 177.57(13)         | C(4)-C(5)-N(5)-C(6) | -0.8(2)            |
| C(1)-C(2)-C(3)-N(3) | 0.09(15)           | C(4)-C(5)-N(6)-N(7) | 5.5(2)             |
| C(1)-C(2)-C(6)-N(4) | 2.4(3)             | C(6)-C(2)-C(3)-C(4) | 2.1(2)             |



|                     |             |                     |             |
|---------------------|-------------|---------------------|-------------|
| C(1)-C(2)-C(6)-N(5) | -176.37(15) | C(6)-C(2)-C(3)-N(3) | -175.42(12) |
| C(1)-N(2)-N(3)-C(3) | 0.51(17)    | N(1)-C(1)-C(2)-C(3) | -175.74(15) |
| C(2)-C(1)-N(2)-N(3) | -0.43(16)   | N(1)-C(1)-C(2)-C(6) | -1.4(3)     |
| C(2)-C(3)-C(4)-C(5) | -0.7(2)     | N(1)-C(1)-N(2)-N(3) | 175.82(14)  |
| C(2)-C(3)-N(3)-N(2) | -0.37(16)   | N(2)-C(1)-C(2)-C(3) | 0.22(16)    |
| C(2)-C(6)-N(5)-C(5) | 2.1(2)      | N(2)-C(1)-C(2)-C(6) | 174.60(16)  |
| C(3)-C(2)-C(6)-N(4) | 176.20(15)  | N(3)-C(3)-C(4)-C(5) | 176.09(14)  |
| C(3)-C(2)-C(6)-N(5) | -2.6(2)     | N(4)-C(6)-N(5)-C(5) | -176.82(14) |
| C(3)-C(4)-C(5)-N(5) | 0.1(2)      | N(5)-C(5)-N(6)-N(7) | -174.12(13) |
| C(3)-C(4)-C(5)-N(6) | -179.48(14) | N(6)-C(5)-N(5)-C(6) | 178.81(13)  |
| C(4)-C(3)-N(3)-N(2) | -177.59(14) |                     |             |

**Table S8.** Bond lengths [Å] for 5·H<sub>2</sub>O

| parameter  | Bond lengths [Å] | parameter    | Bond lengths [Å] |
|------------|------------------|--------------|------------------|
| C(1)-N(1)  | 1.314(4)         | N(2)-H(2)    | 0.86             |
| C(1)-N(4)  | 1.386(4)         | N(3)-H(3)    | 0.86             |
| C(1)-C(6)  | 1.424(4)         | N(4)-H(4A)   | 0.8215           |
| C(2)-N(2)  | 1.338(4)         | N(4)-H(4B)   | 0.8983           |
| C(2)-C(6)  | 1.405(4)         | N(4)-H(4B)#1 | 0.8983           |
| C(2)-C(3)  | 1.406(4)         | N(5)-H(5A)   | 0.86             |
| C(3)-C(4)  | 1.347(4)         | N(5)-H(5B)   | 0.86             |
| C(3)-H(3A) | 0.93             | N(6)-N(7)    | 1.251(4)         |
| C(4)-N(3)  | 1.373(4)         | N(7)-N(8)    | 1.104(4)         |
| C(4)-N(6)  | 1.398(4)         | N(9)-O(2)    | 1.232(3)         |
| C(5)-N(5)  | 1.322(4)         | N(9)-O(3)    | 1.234(3)         |
| C(5)-N(3)  | 1.354(4)         | N(9)-O(1)    | 1.239(3)         |
| C(5)-C(6)  | 1.409(4)         | O(4)-H(4C)   | 0.96             |
| N(1)-N(2)  | 1.369(3)         | O(4)-H(4D)   | 0.96             |

**Table S9.** Bond angles [°] for 5·H<sub>2</sub>O.

| parameter       | Bond angles [°] | parameter          | Bond angles [°] |
|-----------------|-----------------|--------------------|-----------------|
| N(1)-C(1)-N(4)  | 120.7(3)        | C(2)-N(2)-H(2)     | 123.6           |
| N(1)-C(1)-C(6)  | 111.3(2)        | N(1)-N(2)-H(2)     | 123.6           |
| N(4)-C(1)-C(6)  | 128.1(3)        | C(5)-N(3)-C(4)     | 124.4(2)        |
| N(2)-C(2)-C(6)  | 106.1(3)        | C(5)-N(3)-H(3)     | 117.8           |
| N(2)-C(2)-C(3)  | 131.0(3)        | C(4)-N(3)-H(3)     | 117.8           |
| C(6)-C(2)-C(3)  | 122.9(3)        | C(1)-N(4)-H(4A)    | 112.1           |
| C(4)-C(3)-C(2)  | 115.5(3)        | C(1)-N(4)-H(4B)    | 108.2           |
| C(4)-C(3)-H(3A) | 122.2           | H(4A)-N(4)-H(4B)   | 111.1           |
| C(2)-C(3)-H(3A) | 122.2           | C(1)-N(4)-H(4B)#1  | 108.19(9)       |
| C(3)-C(4)-N(3)  | 122.1(3)        | H(4A)-N(4)-H(4B)#1 | 111.1           |
| C(3)-C(4)-N(6)  | 127.2(3)        | H(4B)-N(4)-H(4B)#1 | 105.9           |

|                |          |                  |          |
|----------------|----------|------------------|----------|
| N(3)-C(4)-N(6) | 110.7(2) | C(5)-N(5)-H(5A)  | 120      |
| N(5)-C(5)-N(3) | 118.0(3) | C(5)-N(5)-H(5B)  | 120      |
| N(5)-C(5)-C(6) | 126.0(3) | H(5A)-N(5)-H(5B) | 120      |
| N(3)-C(5)-C(6) | 116.0(3) | N(7)-N(6)-C(4)   | 113.9(2) |
| C(2)-C(6)-C(5) | 119.1(3) | N(8)-N(7)-N(6)   | 172.5(3) |
| C(2)-C(6)-C(1) | 104.5(2) | O(2)-N(9)-O(3)   | 120.7(3) |
| C(5)-C(6)-C(1) | 136.4(3) | O(2)-N(9)-O(1)   | 118.5(3) |
| C(1)-N(1)-N(2) | 105.4(2) | O(3)-N(9)-O(1)   | 120.8(3) |
| C(2)-N(2)-N(1) | 112.8(2) | H(4C)-O(4)-H(4D) | 109.5    |

Symmetry transformations used to generate equivalent atoms:

#1 x,-y+1/2,z

**Table S10.** Hydrogen bonds for **5**·H<sub>2</sub>O [Å and °].

| D-H...A                                         | d(D-H) | d(H...A) | d(D...A) | <(DHA) |
|-------------------------------------------------|--------|----------|----------|--------|
| C(3)-H(3A)...O(1)                               | 0.93   | 2.45     | 3.147(4) | 131.7  |
| N(2)-H(2)...N(9)                                | 0.86   | 2.61     | 3.455(4) | 168.6  |
| N(2)-H(2)...O(1)                                | 0.86   | 2.28     | 2.993(3) | 140.2  |
| N(2)-H(2)...O(2)                                | 0.86   | 2.21     | 3.040(3) | 163.3  |
| N(3)-H(3)...O(3)#2                              | 0.86   | 1.97     | 2.830(3) | 179.7  |
| N(4)-H(4A)...N(6)#3                             | 0.82   | 2.66     | 3.445(4) | 159.3  |
| N(4)-H(4A)...O(3)#4                             | 0.82   | 2.51     | 2.985(3) | 118.3  |
| N(4)-H(4B)...O(4 <sup>a</sup> )#4               | 0.9    | 2.26     | 2.904(4) | 128.7  |
| N(4)-H(4B)...O(4 <sup>a</sup> )#5               | 0.9    | 2.02     | 2.897(4) | 165    |
| N(5)-H(5A)...O(2)#2                             | 0.86   | 2.07     | 2.929(3) | 178.2  |
| N(5)-H(5B)...O(4 <sup>a</sup> )#4               | 0.86   | 2.08     | 2.875(4) | 153.5  |
| N(5)-H(5B)...O(4 <sup>a</sup> )#6               | 0.86   | 2.08     | 2.875(4) | 153.5  |
| O(4 <sup>a</sup> )-H(4C <sup>a</sup> )...N(4)#5 | 0.96   | 2.36     | 2.897(4) | 114.7  |
| O(4 <sup>a</sup> )-H(4C <sup>a</sup> )...N(8)   | 0.96   | 2.39     | 3.116(5) | 132.2  |
| O(4 <sup>a</sup> )-H(4D <sup>a</sup> )...O(1)   | 0.96   | 2.06     | 2.753(4) | 127.3  |

Symmetry transformations used to generate equivalent atoms:

#1 x,-y+1/2,z #2 x,y,z-1 #3 x-1,y,z #4 x-1,y,z-1

#5 -x+1,-y,-z+1 #6 x-1,-y+1/2,z-1

**Table S11.** Torsion Angles [°] for **5**·H<sub>2</sub>O

| parameter   | Bond lengths [Å] | parameter   | Bond lengths [Å] |
|-------------|------------------|-------------|------------------|
| N1-C1-C6-C2 | 0.000(1)         | N6-C4-N3-C5 | 180.000(1)       |
| N1-C1-C6-C5 | 180.000(1)       | C1-N1-N2-C2 | 0.000(1)         |
| N2-C2-C3-C4 | 180.000(1)       | C2-C3-C4-N3 | 0.000(1)         |
| N2-C2-C6-C1 | 0.000(1)         | C2-C3-C4-N6 | 180.000(1)       |
| N2-C2-C6-C5 | 180.000(1)       | C3-C2-N2-N1 | 180.000(1)       |
| N3-C4-N6-N7 | 180.000(1)       | C3-C2-C6-C1 | 180.000(1)       |
| N3-C5-C6-C1 | 180.000(1)       | C3-C2-C6-C5 | 0.000(1)         |
| N3-C5-C6-C2 | 0.000(1)         | C3-C4-N3-C5 | 0.000(1)         |
| N4-C1-N1-N2 | 180.000(0)       | C3-C4-N6-N7 | 0.000(1)         |
| N4-C1-C6-C2 | 180.000(1)       | C6-C1-N1-N2 | 0.000(1)         |
| N4-C1-C6-C5 | 0.000(1)         | C6-C2-N2-N1 | 0.000(1)         |
| N5-C5-N3-C4 | 180.000(1)       | C6-C2-C3-C4 | 0.000(1)         |
| N5-C5-C6-C1 | 0.000(1)         | C6-C5-N3-C4 | 0.000(1)         |
| N5-C5-C6-C2 | 180.000(1)       |             |                  |

## Thermal stability

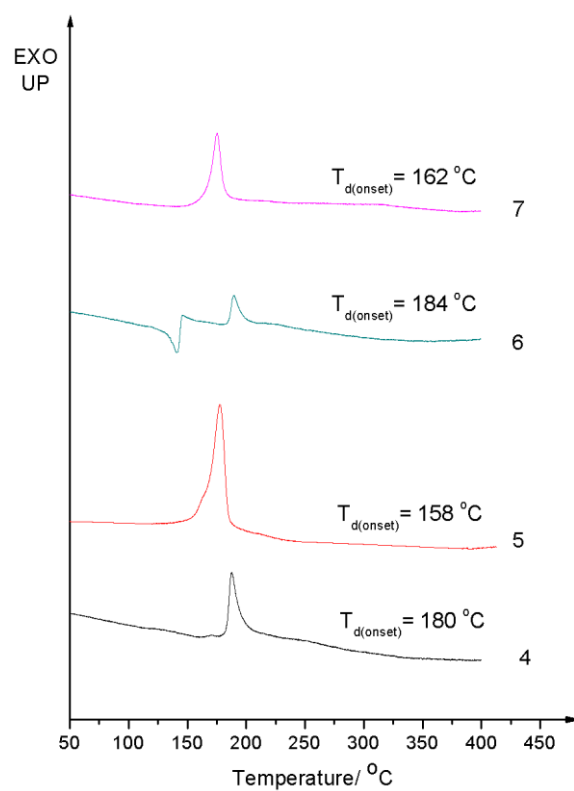

**Figure S2.** DSC plots for compounds 4-7

## Spectral data

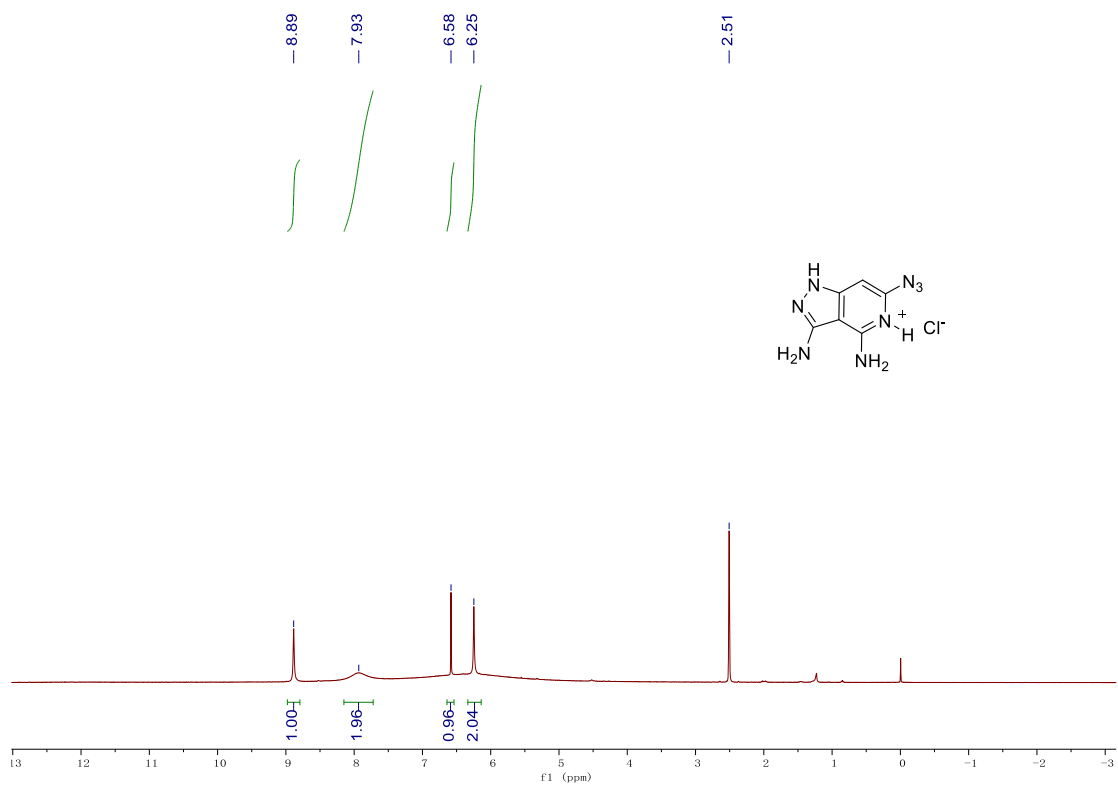

Figure S3. <sup>1</sup>H NMR spectra for compound 3

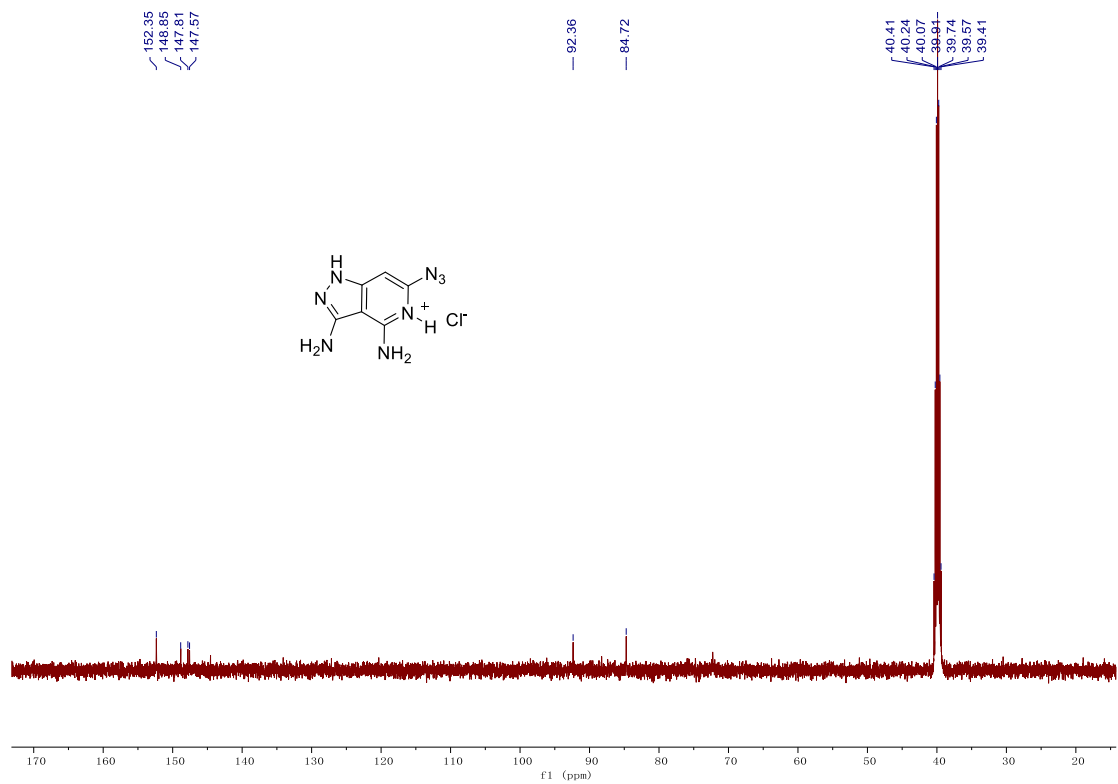

Figure S4. <sup>13</sup>C NMR spectra for compound 3

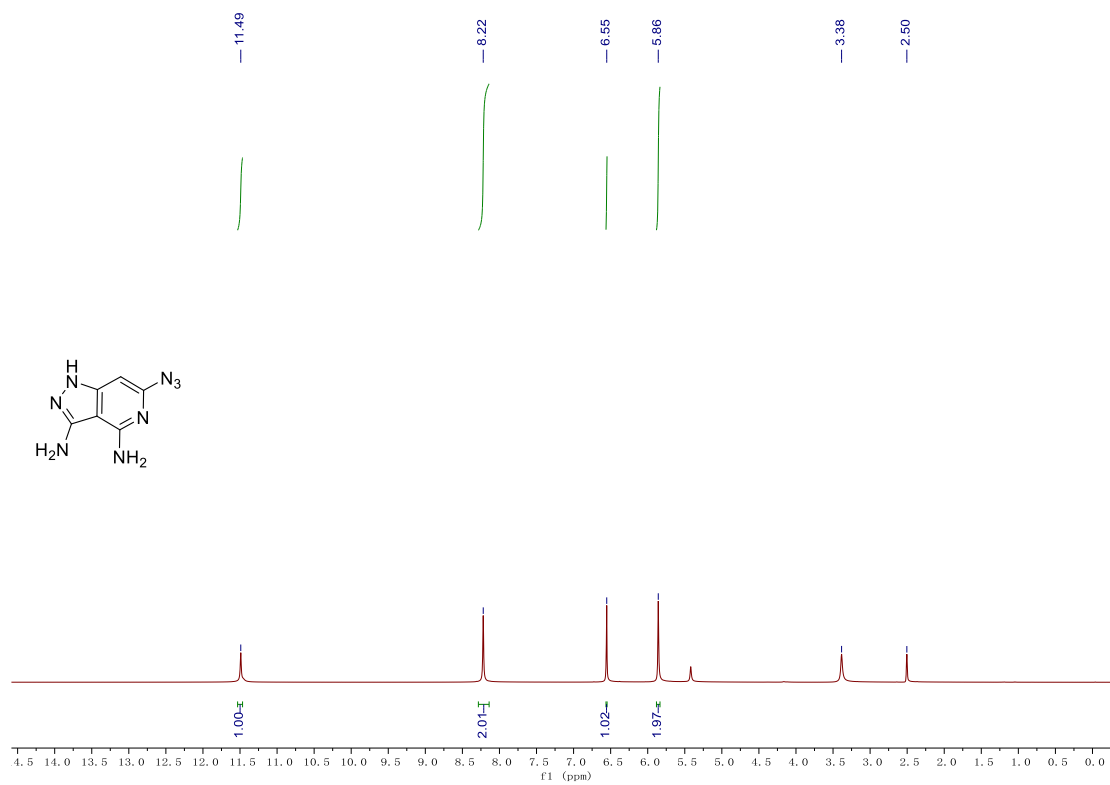

Figure S5.  $^1\text{H NMR}$  spectra for compound 4

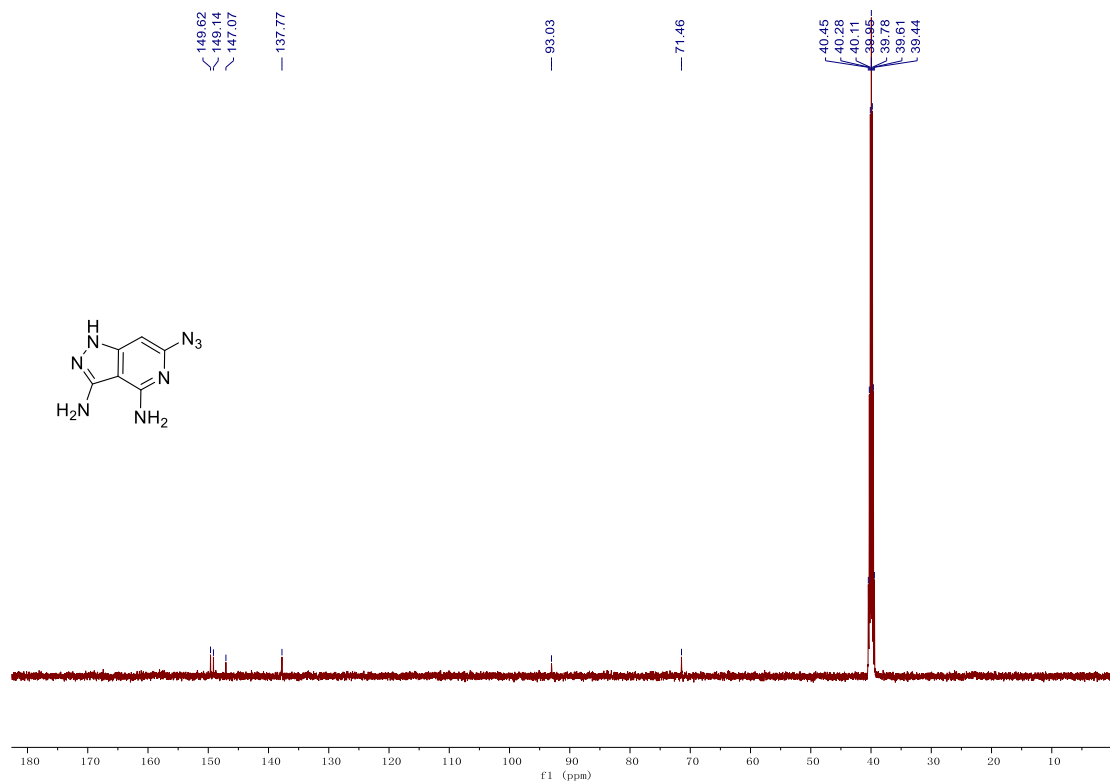

Figure S6.  $^{13}\text{C NMR}$  spectra for compound 4

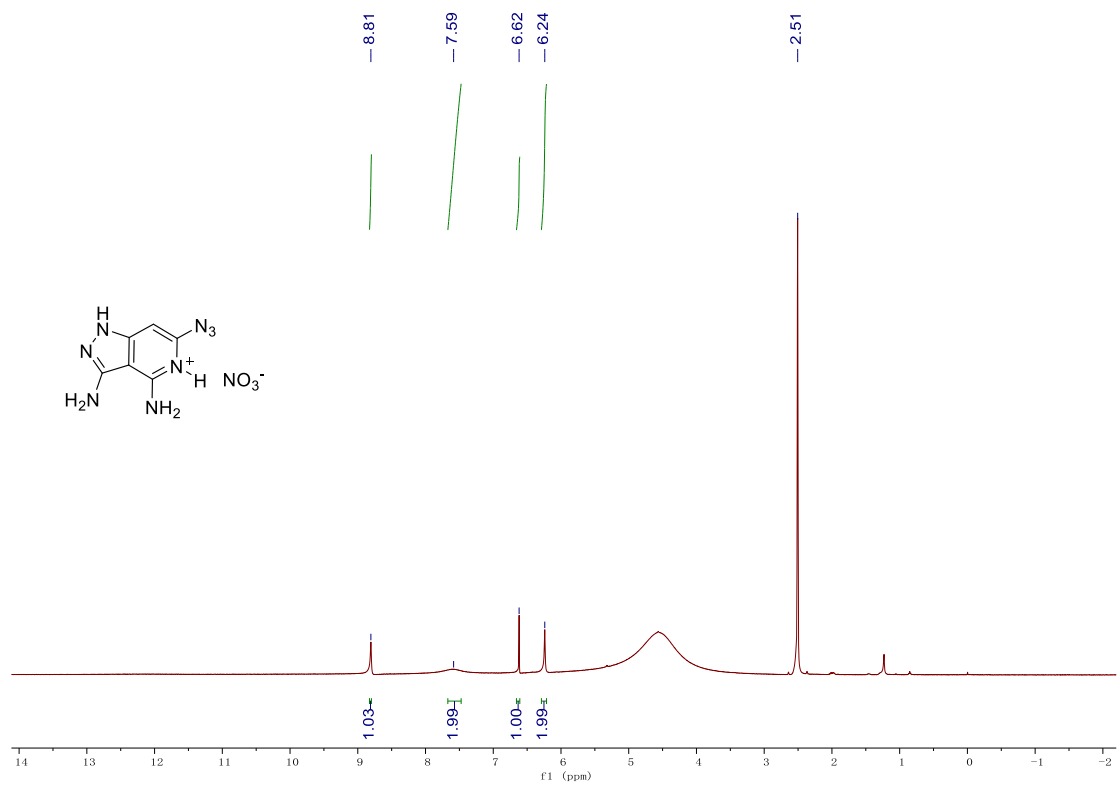

Figure S7. <sup>1</sup>H NMR spectra for compound 5

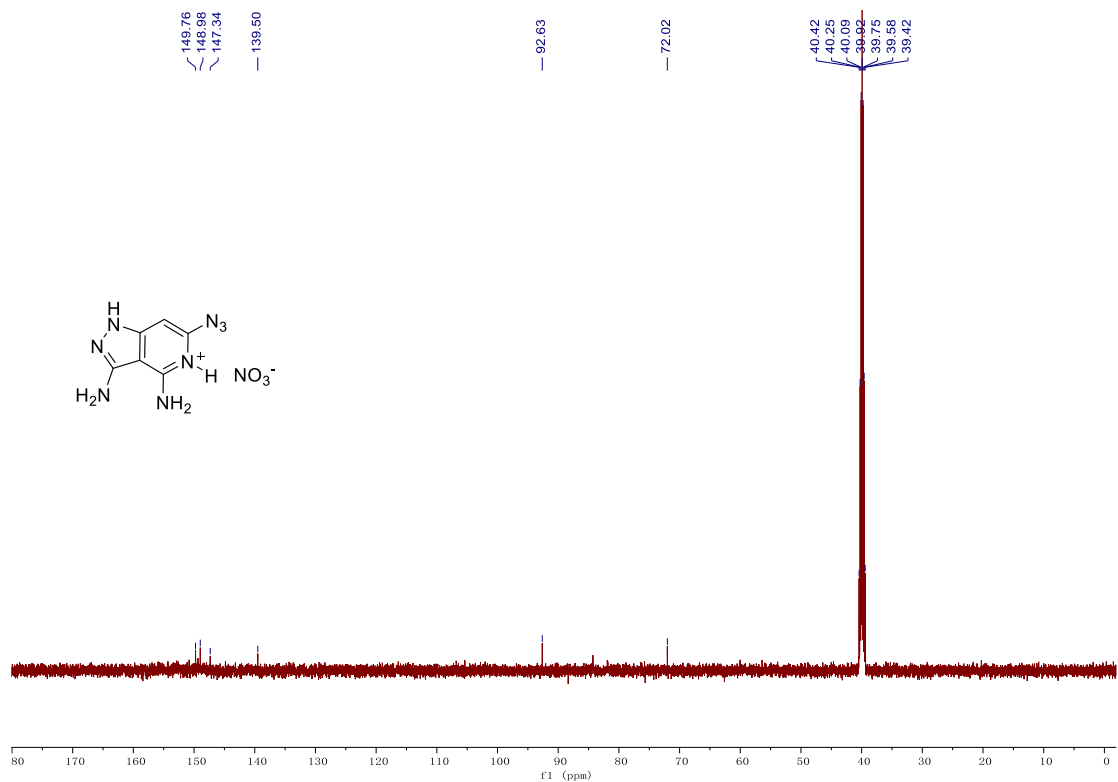

Figure S8. <sup>13</sup>C NMR spectra for compound 5

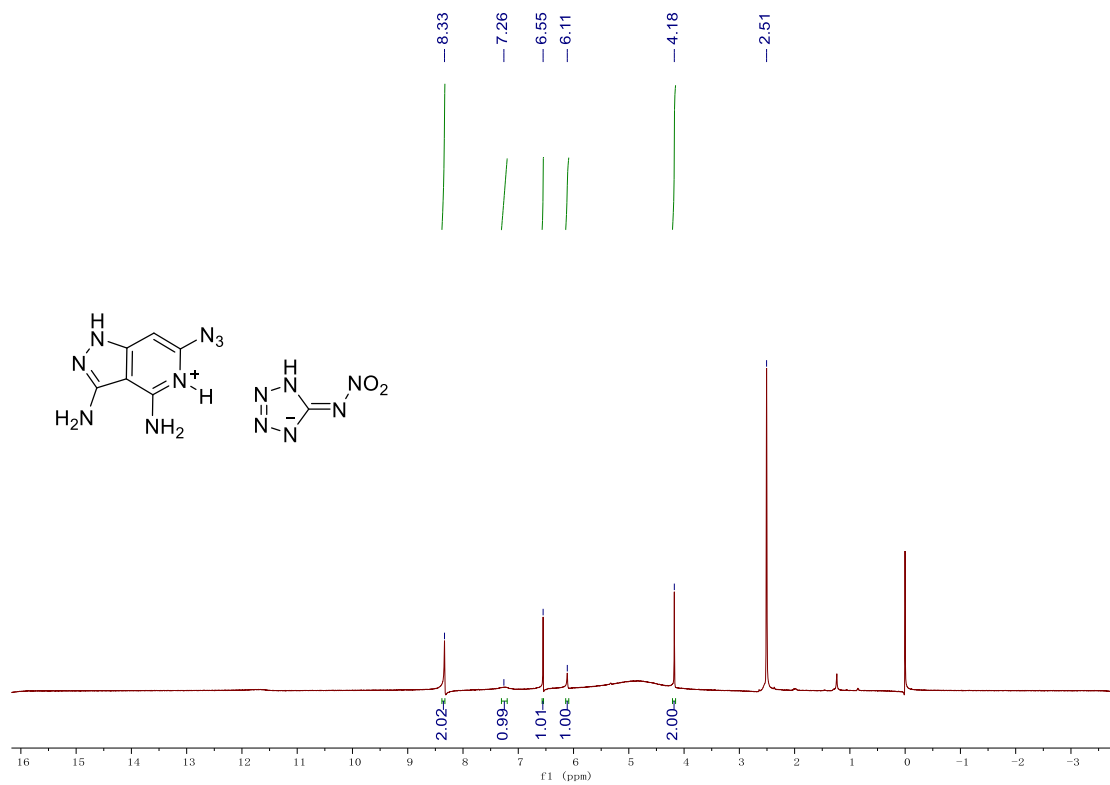

Figure S9.  $^1\text{H}$  NMR spectra for compound **6**

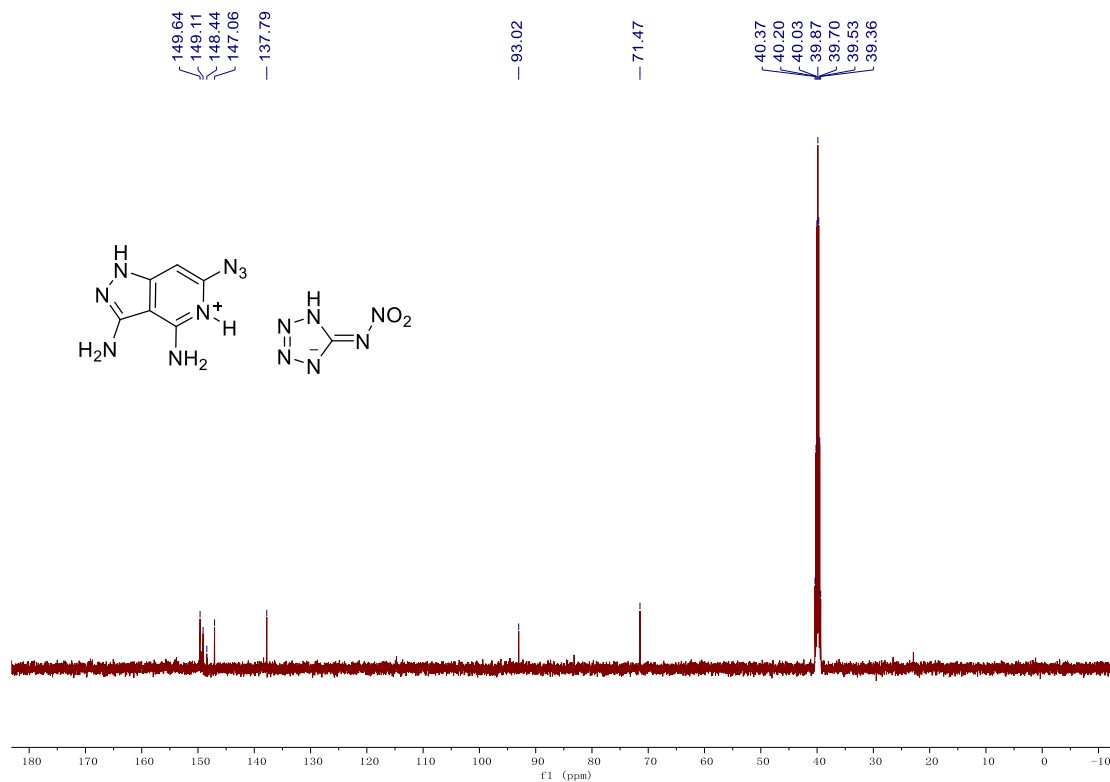

Figure S10.  $^{13}\text{C}$  NMR spectra for compound **6**

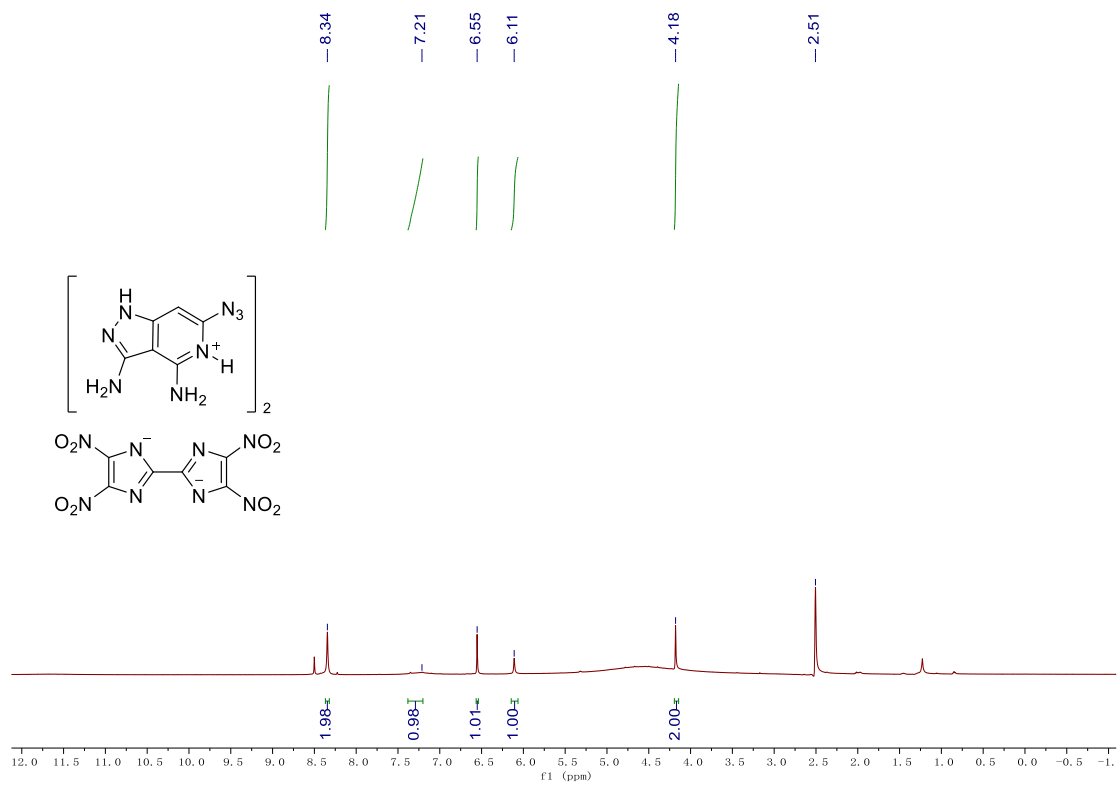

Figure S11. <sup>1</sup>H NMR spectra for compound 7

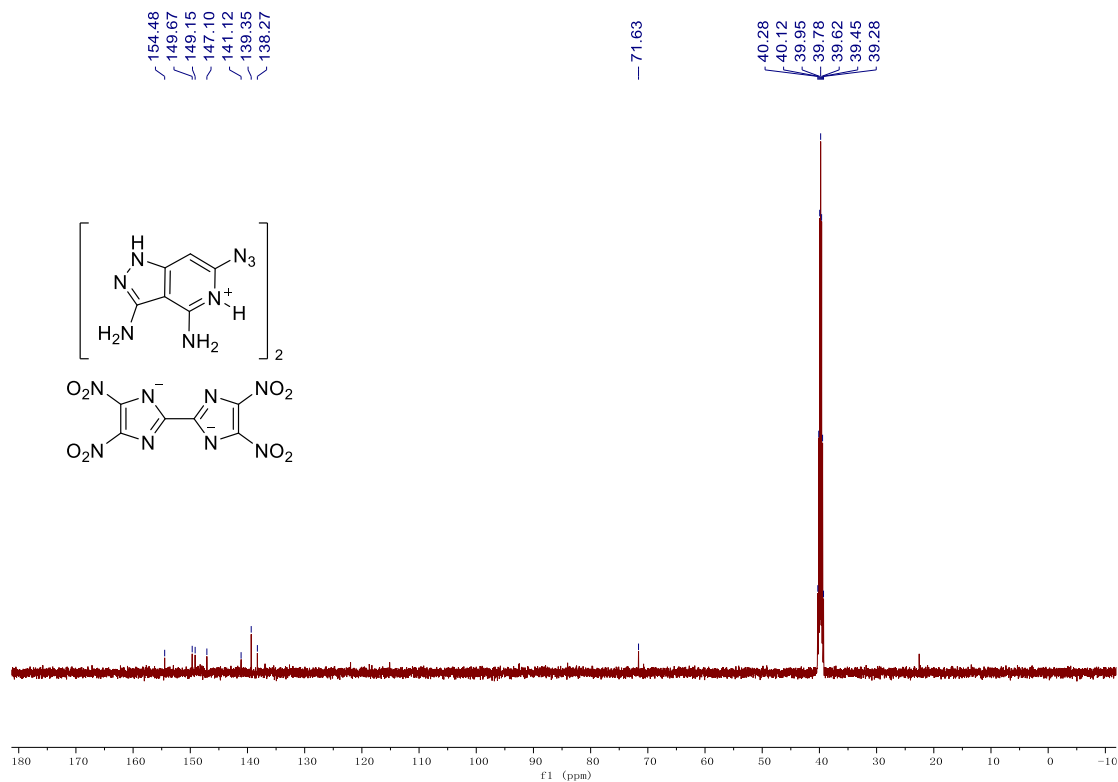

Figure S12. <sup>13</sup>C NMR spectra for compound 7



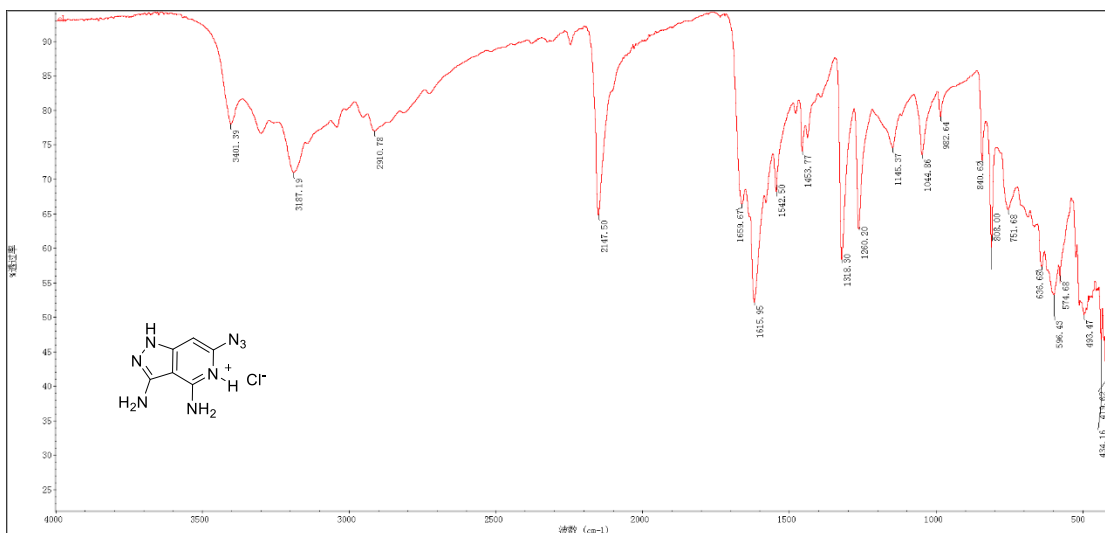

Figure S13. IR spectra for 3.

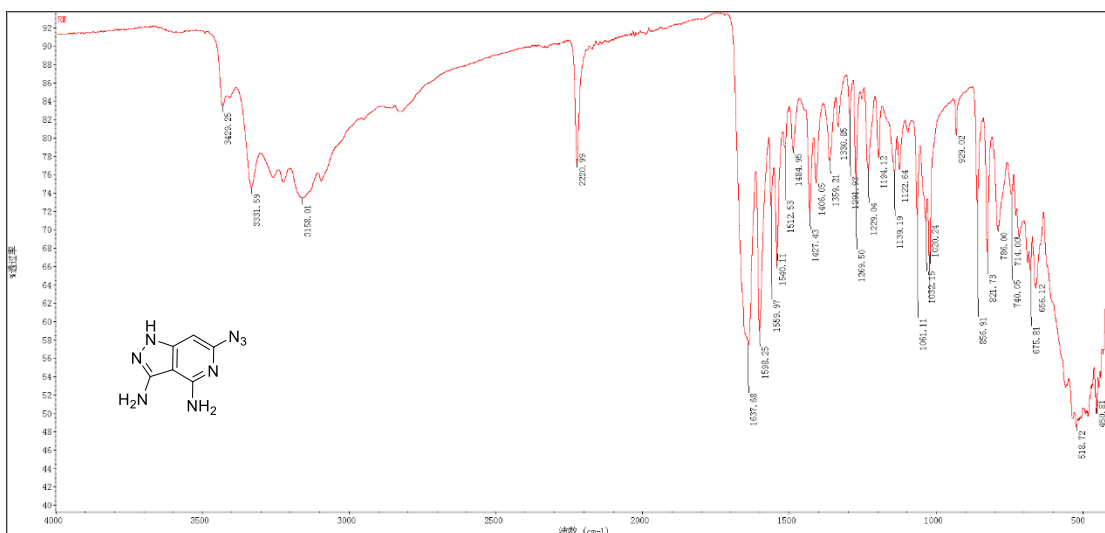

Figure S14. IR spectra for 4.

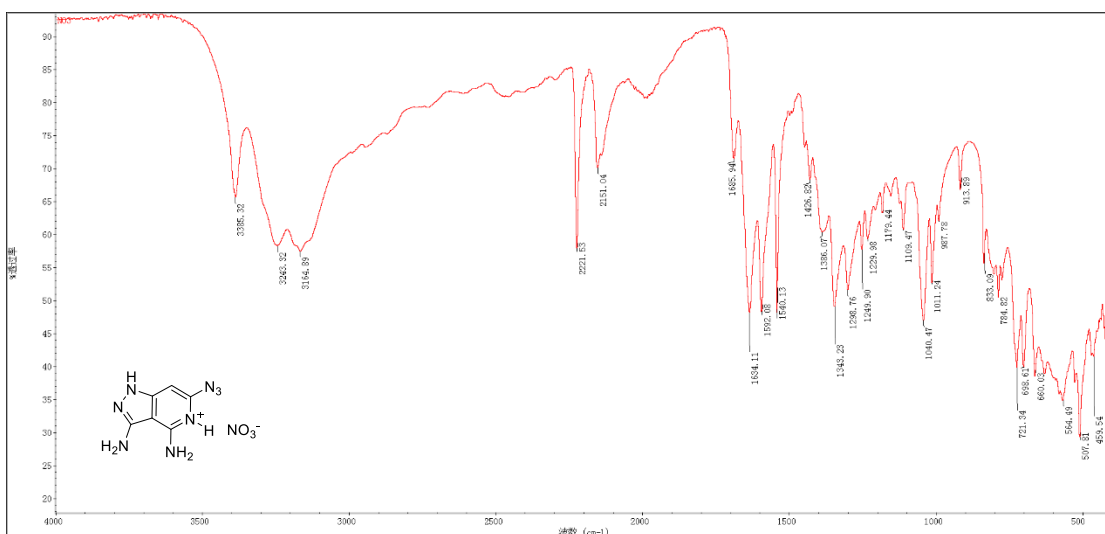

Figure S15. IR spectra for 5.

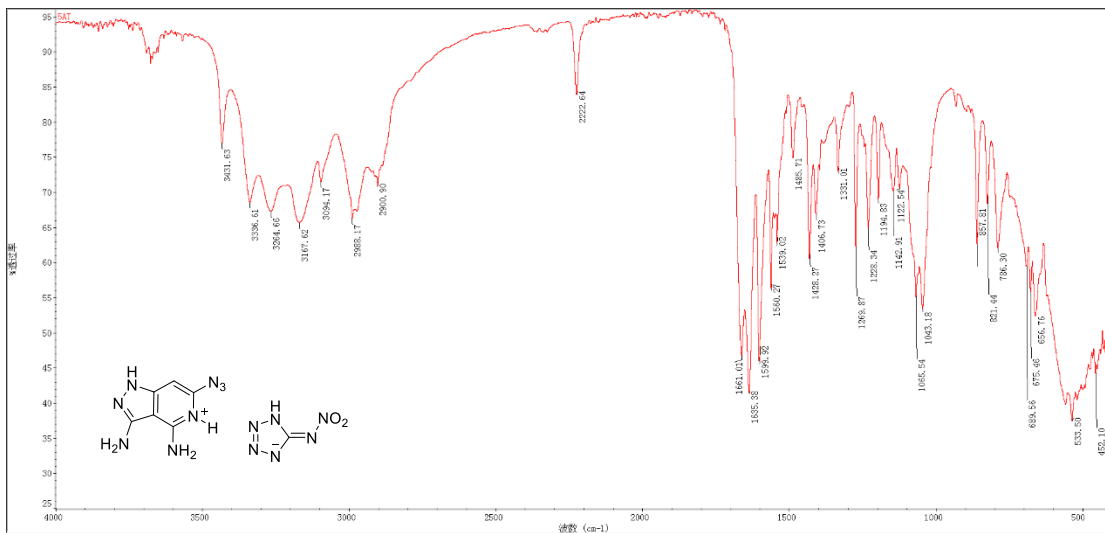

Figure S16. IR spectra for 6.

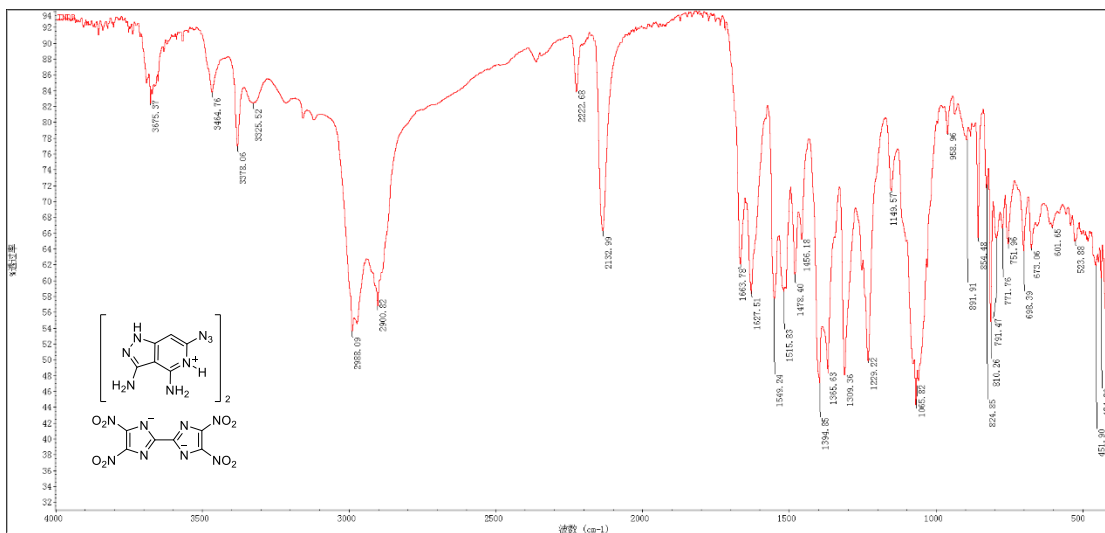

Figure S17. IR spectra for 7.

## References

1. M. J. Frisch, G. W. Trucks, H. B. Schlegel, G. E. Scuseria, M. A. Robb, J. R. Cheeseman, G. Scalmani, V. Barone, B. Mennucci, G. A. Petersson, H. Nakatsuji, M. Caricato, X. Li, H. P. Hratchian, A. F. Izmaylov, J. Bloino, G. Zheng, J. L. Sonnenberg, M. Hada, M. Ehara, K. Toyota, R. Fukuda, J. Hasegawa, M. Ishida, T. Nakajima, Y. Honda, O. Kitao, H. Nakai, T. Vreven, J. A. Montgomery, Jr., J. E. Peralta, F. Ogliaro, M. Bearpark, J. J. Heyd, E. Brothers, K. N. Kudin, V. N. Staroverov, R. Kobayashi, J. Normand, K. Raghavachari, A. Rendell, J. C. Burant, S. S. Iyengar, J. Tomasi, M. Cossi, N. Rega, J. M. Millam, M. Klene, J. E. Knox, J. B. Cross, V. Bakken, C. Adamo, J. Jaramillo, R. Gomperts, R. E. Stratmann, O. Yazyev, A. J. Austin, R. Cammi, C. Pomelli, J. W. Ochterski, R. L. Martin, K. Morokuma, V. G. Zakrzewski, G. A. Voth, P. Salvador, J. J. Dannenberg, S. Dapprich, A. D. Daniels, Ö. Farkas, J. B. Foresman, J. V. Ortiz, J. Cioslowski, and D. J. Fox, *Gaussian, Inc.*, Wallingford CT, 2009.
2. Y. Zhao and D. G. Truhlar, The M06 suite of density functionals for main group thermochemistry, thermochemical kinetics, noncovalent interactions, excited states, and transition elements: Two new functionals and systematic testing of four M06-class functionals and 12 other functionals, *Theor. Chem. Account.*, 2008, **120**, 215–241.
3. F. Weigend and R. Ahlrichs, Balanced basis sets of split valence, triple zeta valence and quadruple zeta valence quality for H to Rn: Design and assessment of accuracy, *Phys. Chem. Chem. Phys.*, 2005, **7**, 3297-3305.
4. H. D. B. Jenkins, D. Tudela and L. Glasser, Lattice potential energy estimation for complex ionic salts from density measurements, *Inorg. Chem.*, 2002, **41**, 2364-2367.
5. E. F. C. Byra and B. M. Rice, Improved prediction of heats of formation of energetic materials using quantum mechanical calculations, *J. Phys. Chem. A*, 2006, **110**, 1005-1013
6. H. Xiong, H. Yang and G. Cheng, 3-Trinitromethyl-4-nitro-5-nitramine-1H-pyrazole: A high energy density oxidizer, *New J. Chem.*, 2019, **43**, 13827-13831.
